# Supplementary material for: Profiling of differentially expressed microRNAs in arrhythmogenic right ventricular cardiomyopathy
Source: PubMed Central journal article supplement (PMC4910108; doi:10.1038/srep28101), 2016-06-16
Supplement: srep28101-s1.pdf [file srep28101-s1.pdf]

**Profiling of differentially expressed microRNAs in arrhythmogenic right  
ventricular cardiomyopathy**

Hongliang Zhang<sup>1,2,3</sup>, Shenghua Liu<sup>1</sup>, Tianwei Dong<sup>2</sup>, Jun Yang<sup>2</sup>, Yuanyuan Xie<sup>1</sup>, Yike  
Wu<sup>3</sup>, Kang Kang<sup>4</sup>, shengshou Hu<sup>1</sup>, Deming Gou<sup>3#</sup>, Yingjie Wei<sup>1#</sup>

## Supplementary Information

**Supplementary table S1 Primers and probe sequences used in S-Poly(T) plus method.**

**Supplementary table S2 The area under the curve (AUC) of individual miRNA.**

**Supplementary table S3 The scores of GO terms of miR-21-5p and miR-135b.**

**Supplementary table S1 Primers and probe sequences for S-Poly(T) method.**

| miRNA                    | Sequence (5'-3') | Forward primer                           | RT primer             |                                                      |
|--------------------------|------------------|------------------------------------------|-----------------------|------------------------------------------------------|
| >hsa-miR-21-3p           | MIMAT0004494     | CAACACCAGUCGAUGGGCUGU                    | TCGGCAACACCAGTTCGATG  | GTGCAGGGTCCGAGGTCAGAGCCACCTGGGCAATTTTTTTTTTTACAGCC   |
| >hsa-miR-21-5p           | MIMAT0000076     | UAGCUUAUCAGACUGAUGUUGA                   | TTCGGTAGCTTATCAGACTGA | GTGCAGGGTCCGAGGTCAGAGCCACCTGGGCAATTTTTTTTTTTCAACAT   |
| >hsa-miR-34a-5p          | MIMAT0000255     | UGGCAGUGUCUUAGCUGGUUGU                   | CGGTGGCAGTGTCTTAGCT   | GTGCAGGGTCCGAGGTCAGAGCCACCTGGGCAATTTTTTTTTTTACAACC   |
| >hsa-miR-212-3p          | MIMAT0000269     | UACAGUCUCCAGUCACGGCC                     | TTCGGTAACAGTCTCCAGTC  | GTGCAGGGTCCGAGGTCAGAGCCACCTGGGCAATTTTTTTTTTTGGCCGT   |
| >hsa-miR-216a            | MIMAT0000273     | UAAUCUCAGCUGGCAACUGUGA                   | TCGGTAATCTCAGCTGGCAA  | GTGCAGGGTCCGAGGTCAGAGCCACCTGGGCAATTTTTTTTTTTTACAGT   |
| >hsa-miR-584-3p          | MIMAT0022708     | UCAGUCCAGGCCAACCAGGCU                    | TGGTCAGTTCAGGCCAAC    | GTGCAGGGTCCGAGGTCAGAGCCACCTGGGCAATTTTTTTTTTTAGCCTG   |
| >hsa-miR-1251            | MIMAT0005903     | ACUCUAGCUGCCAAAGGCGCU                    | TTCGGACTCTAGCTGCCAAA  | GTGCAGGGTCCGAGGTCAGAGCCACCTGGGCAATTTTTTTTTTTAGCGCC   |
| >hsa-miR-3621            | MIMAT0018002     | CGCGGGUCGGGGUCUGCAGG                     | GGCGCGGGTCCGGGTC      | GTGCAGGGTCCGAGGTCAGAGCCACCTGGGCAATTTTTTTTTTTCTGCA    |
| >hsa-miR-3674            | MIMAT0018097     | AUUGUAGAACCUAAGAUUGGCC                   | GTCGGATTGTAGAACCTAAGA | GTGCAGGGTCCGAGGTCAGAGCCACCTGGGCAATTTTTTTTTTTGGCCAA   |
| >hsa-miR-3692-3p         | MIMAT0018122     | GUUCCACACUGACACUGCAGAAGU                 | GGTTCACACTGACACTGC    | GTGCAGGGTCCGAGGTCAGAGCCACCTGGGCAATTTTTTTTTTTACTTCT   |
| >hsa-miR-4286            | MIMAT0016916     | ACCCACUCCUGGUACC                         | TGGTCGGACCCACTCCT     | GTGCAGGGTCCGAGGTCAGAGCCACCTGGGCAATTTTTTTTTTTTGGTACC  |
| >hsa-miR-4301            | MIMAT0016850     | UCCACUACUACUUGUGA                        | GTCGGTCCCACTACTTCAC   | GTGCAGGGTCCGAGGTCAGAGCCACCTGGGCAATTTTTTTTTTTTACAAG   |
| >hsa-miR-135b            | MIMAT0000758     | UAUGGCUUUCAUUCUUAUGUGA                   | TCGGTATGGCTTTTCATTCT  | GTGCAGGGTCCGAGGTCAGAGCCACCTGGGCAATTTTTTTTTTTTACATA   |
| >hsa-miR-138-5p          | MIMAT0000430     | AGCUGGUGUUGUGAAUCAGGCCG                  | TGGAGCTGGTGTGTGAATC   | GTGCAGGGTCCGAGGTCAGAGCCACCTGGGCAATTTTTTTTTTTTCGGCCT  |
| >hsa-miR-193b-3p         | MIMAT0002819     | AACUGGCCUCAAGUCCCGCU                     | CGGAACCTGGCCCTCAAAGT  | GTGCAGGGTCCGAGGTCAGAGCCACCTGGGCAATTTTTTTTTTTAGCGGG   |
| >hsa-miR-302b-3p         | MIMAT0000715     | UAAGUGCUUCAUGUUUAGUAG                    | TCGGTAAGTGCTTCCATGTTT | GTGCAGGGTCCGAGGTCAGAGCCACCTGGGCAATTTTTTTTTTTTCTACTA  |
| >hsa-miR-302c-3p         | MIMAT0000717     | UAAGUGCUUCAUGUUUCAGUGG                   | TCGGTAAGTGCTTCCATGTTT | GTGCAGGGTCCGAGGTCAGAGCCACCTGGGCAATTTTTTTTTTTTCCACTG  |
| >hsa-miR-338-3p          | MIMAT0000763     | UCCAGCAUCAGUGAUUUUGUUG                   | TCGGTCCAGCATCAGTGATT  | GTGCAGGGTCCGAGGTCAGAGCCACCTGGGCAATTTTTTTTTTTTCAACAA  |
| >hsa-miR-451a            | MIMAT0001631     | AAACCGUACCAUACUGAGUU                     | TTCGGAAACCGTTACCATTAC | GTGCAGGGTCCGAGGTCAGAGCCACCTGGGCAATTTTTTTTTTTAACTCA   |
| >hsa-miR-491-3p          | MIMAT0004765     | CUUUGCAAGAUCCCUUCUAC                     | TCGGCTTATGCAAGATTCCC  | GTGCAGGGTCCGAGGTCAGAGCCACCTGGGCAATTTTTTTTTTTGTAGAA   |
| >hsa-miR-575             | MIMAT0003240     | GAGCCAGUUGGACAGGAGC                      | GTCGGGAGCCAGTTGGAC    | GTGCAGGGTCCGAGGTCAGAGCCACCTGGGCAATTTTTTTTTTTTGTCTCT  |
| >hsa-miR-3529-5p         | MIMAT0019828     | AGGUAGACUGGGAUUUGUUGUU                   | TCGGAGGTAGACTGGGATTT  | GTGCAGGGTCCGAGGTCAGAGCCACCTGGGCAATTTTTTTTTTTTAAACAAC |
| >hsa-miR-4254            | MIMAT0016884     | GCCUGGAGCUACUCCACCAUCUC                  | GGCCTGGAGCTACTCCAC    | GTGCAGGGTCCGAGGTCAGAGCCACCTGGGCAATTTTTTTTTTTGTAGATG  |
| >hsa-miR-4643            | MIMAT0019703     | GACACAUGACCAUAAAUGCUAA                   | TTCGGGACACATGACCATAAA | GTGCAGGGTCCGAGGTCAGAGCCACCTGGGCAATTTTTTTTTTTTAGCATT  |
| SNORD-44                 |                  | CCTGGATGATGATAAGCAAATGCTGAC              | TGGCCTGGATGATGATAAGCA | GTGCAGGGTCCGAGGTCAGAGCCACCTGGGCAATTTTTTTTTTTTAGTCAG  |
|                          |                  | TGAACATGAAGGTCTTAATTAGCTCTAA             |                       |                                                      |
|                          |                  | CTGACT                                   |                       |                                                      |
| Universal reverse primer |                  | CAGTGCAGGGTCCGAGGT                       |                       |                                                      |
| Universal Taqman probe   |                  | 56-FAM/CAGAGCCAC/ZEN/CTGGGCAATTT/3IABkFQ |                       |                                                      |

**Supplementary table S2 the area under the curve (AUC) of individual miRNA .**

| miRNA name  | AUC   | P value | Cut off | sensitivity(%) | Specificity(%) |
|-------------|-------|---------|---------|----------------|----------------|
| miR-21-3p   | 0.936 | < 0.001 | 0.0255  | 87.5           | 100            |
| miR-21-5p   | 0.944 | < 0.001 | 9.497   | 87.5           | 91.7           |
| miR-34a-5p  | 0.836 | < 0.001 | 0.942   | 95.8           | 70.8           |
| miR-212-3p  | 0.91  | < 0.001 | 0.0751  | 83.3           | 92.7           |
| miR-216a    | 0.8   | < 0.001 | 0.027   | 75             | 91.3           |
| miR-584-3p  | 0.786 | 0.001   | 0.254   | 42             | 95.7           |
| miR-1251    | 0.978 | < 0.001 | 0.497   | 91.3           | 95.8           |
| miR-3621    | 0.849 | < 0.001 | 1.183   | 69.6           | 95             |
| miR-3692-3p | 0.861 | < 0.001 | 0.049   | 91.7           | 97.9           |
| miR-4286    | 0.778 | 0.001   | 58.49   | 65.2           | 87.5           |
| miR-4301    | 0.799 | < 0.001 | 6.442   | 91.7           | 54.2           |
| miR-135b    | 0.932 | < 0.001 | 0.073   | 95.2           | 85.7           |
| miR-138-5p  | 0.758 | 0.002   | 0.006   | 87.5           | 54.2           |
| miR-193b-3p | 0.946 | < 0.001 | 3.085   | 95.7           | 91.3           |
| miR-302b-3p | 0.991 | < 0.001 | 0.104   | 95.8           | 95.8           |
| miR-302c-3p | 0.992 | < 0.001 | 0.051   | 95.8           | 91.7           |
| miR-338-3p  | 0.996 | < 0.001 | 0.709   | 87.5           | 95.2           |
| miR-491-3P  | 0.837 | < 0.001 | 0.123   | 91.7           | 95.200         |
| miR-575     | 0.922 | < 0.001 | 0.099   | 79.2           | 91.7           |
| miR-4254    | 0.838 | < 0.001 | 0.062   | 83.3           | 75             |
| miR-4643    | 0.966 | < 0.001 | 0.159   | 91.7           | 91.7           |

**Supplementary table S3 The scores of GO terms of miR-21-5p and miR-135b.**

| <b>miRNA</b> | <b>ID</b>  | <b>Corrected P-Value</b> | <b>GO_term</b>                                                                |
|--------------|------------|--------------------------|-------------------------------------------------------------------------------|
| miR-21-5p    | GO:0060425 | 0.006025082              | lung morphogenesis                                                            |
| miR-21-5p    | GO:0048863 | 0.006025082              | stem cell differentiation                                                     |
| miR-21-5p    | GO:0001944 | 0.006797634              | vasculature development                                                       |
| miR-21-5p    | GO:0001568 | 0.006797634              | blood vessel development                                                      |
| miR-21-5p    | GO:0061014 | 0.006864386              | positive regulation of mRNA catabolic process                                 |
| miR-21-5p    | GO:0030278 | 0.007161766              | regulation of ossification                                                    |
| miR-21-5p    | GO:0035295 | 0.008845766              | tube development                                                              |
| miR-21-5p    | GO:0061013 | 0.008845766              | regulation of mRNA catabolic process                                          |
| miR-21-5p    | GO:0045778 | 0.008845766              | positive regulation of ossification                                           |
| miR-21-5p    | GO:2000145 | 0.008845766              | regulation of cell motility                                                   |
| miR-21-5p    | GO:0042063 | 0.008845766              | gliogenesis                                                                   |
| miR-21-5p    | GO:0060021 | 0.00970205               | palate development                                                            |
| miR-21-5p    | GO:0061448 | 0.010819458              | connective tissue development                                                 |
| miR-21-5p    | GO:0048514 | 0.011050044              | blood vessel morphogenesis                                                    |
| miR-21-5p    | GO:0030334 | 0.011944962              | regulation of cell migration                                                  |
| miR-21-5p    | GO:0060541 | 0.012527326              | respiratory system development                                                |
| miR-21-5p    | GO:0002062 | 0.012527326              | chondrocyte differentiation                                                   |
| miR-21-5p    | GO:0048864 | 0.012615338              | stem cell development                                                         |
| miR-21-5p    | GO:0006357 | 0.012615338              | regulation of transcription from RNA polymerase II promoter                   |
| miR-21-5p    | GO:0051216 | 0.012615338              | cartilage development                                                         |
| miR-21-5p    | GO:0040012 | 0.012615338              | regulation of locomotion                                                      |
| miR-21-5p    | GO:0051094 | 0.012615338              | positive regulation of developmental process                                  |
| miR-21-5p    | GO:0050793 | 0.012615338              | regulation of developmental process                                           |
| miR-21-5p    | GO:2000113 | 0.015442092              | negative regulation of cellular macromolecule biosynthetic process            |
| miR-21-5p    | GO:0060485 | 0.015740946              | mesenchyme development                                                        |
| miR-21-5p    | GO:0070120 | 0.017406701              | ciliary neurotrophic factor-mediated signaling pathway                        |
| miR-21-5p    | GO:0070848 | 0.017680308              | response to growth factor                                                     |
| miR-21-5p    | GO:0048762 | 0.017680308              | mesenchymal cell differentiation                                              |
| miR-21-5p    | GO:0010634 | 0.017680308              | positive regulation of epithelial cell migration                              |
| miR-21-5p    | GO:0001667 | 0.017680308              | ameboidal-type cell migration                                                 |
| miR-21-5p    | GO:0000289 | 0.017680308              | nuclear-transcribed mRNA poly(A) tail shortening                              |
| miR-21-5p    | GO:0010558 | 0.017680308              | negative regulation of macromolecule biosynthetic process                     |
| miR-21-5p    | GO:0007517 | 0.017680308              | muscle organ development                                                      |
| miR-21-5p    | GO:0072359 | 0.017680308              | circulatory system development                                                |
| miR-21-5p    | GO:0072358 | 0.017680308              | cardiovascular system development                                             |
| miR-21-5p    | GO:0022603 | 0.017680308              | regulation of anatomical structure morphogenesis                              |
| miR-21-5p    | GO:0051254 | 0.018364844              | positive regulation of RNA metabolic process                                  |
| miR-21-5p    | GO:0060324 | 0.01959787               | face development                                                              |
| miR-21-5p    | GO:0000981 | 0.01959787               | sequence-specific DNA binding RNA polymerase II transcription factor activity |
| miR-21-5p    | GO:0051270 | 0.019890116              | regulation of cellular component movement                                     |

|           |            |             |                                                                                                     |
|-----------|------------|-------------|-----------------------------------------------------------------------------------------------------|
| miR-21-5p | GO:0030510 | 0.019890116 | regulation of BMP signaling pathway                                                                 |
| miR-21-5p | GO:0001501 | 0.020759783 | skeletal system development                                                                         |
| miR-21-5p | GO:0001654 | 0.020759783 | eye development                                                                                     |
| miR-21-5p | GO:0048592 | 0.020759783 | eye morphogenesis                                                                                   |
| miR-21-5p | GO:0060325 | 0.021126654 | face morphogenesis                                                                                  |
| miR-21-5p | GO:0010628 | 0.021126654 | positive regulation of gene expression                                                              |
| miR-21-5p | GO:0010001 | 0.021126654 | glial cell differentiation                                                                          |
| miR-21-5p | GO:0030324 | 0.021126654 | lung development                                                                                    |
| miR-21-5p | GO:1900151 | 0.021126654 | regulation of nuclear-transcribed mRNA catabolic process,<br>deadenylation-dependent decay          |
| miR-21-5p | GO:1900153 | 0.021126654 | positive regulation of nuclear-transcribed mRNA catabolic process,<br>deadenylation-dependent decay |
| miR-135b  | GO:0043005 | 0.207449408 | neuron projection                                                                                   |
| miR-135b  | GO:0034765 | 0.207449408 | regulation of ion transmembrane transport                                                           |
| miR-135b  | GO:0097458 | 0.207449408 | neuron part                                                                                         |
| miR-135b  | GO:0042584 | 0.207449408 | chromaffin granule membrane                                                                         |
| miR-135b  | GO:0046873 | 0.207449408 | metal ion transmembrane transporter activity                                                        |
| miR-135b  | GO:0048699 | 0.207449408 | generation of neurons                                                                               |
| miR-135b  | GO:0034762 | 0.207449408 | regulation of transmembrane transport                                                               |
| miR-135b  | GO:0048667 | 0.207449408 | cell morphogenesis involved in neuron differentiation                                               |
| miR-135b  | GO:0042583 | 0.207449408 | chromaffin granule                                                                                  |
| miR-135b  | GO:0022008 | 0.207449408 | neurogenesis                                                                                        |
| miR-135b  | GO:0010558 | 0.220615975 | negative regulation of macromolecule biosynthetic process                                           |
| miR-135b  | GO:0044304 | 0.220615975 | main axon                                                                                           |
| miR-135b  | GO:0007167 | 0.220615975 | enzyme linked receptor protein signaling pathway                                                    |
| miR-135b  | GO:0010506 | 0.220615975 | regulation of autophagy                                                                             |
| miR-135b  | GO:0007268 | 0.220615975 | synaptic transmission                                                                               |
| miR-135b  | GO:0009890 | 0.220615975 | negative regulation of biosynthetic process                                                         |
| miR-135b  | GO:0097485 | 0.220615975 | neuron projection guidance                                                                          |
| miR-135b  | GO:0007411 | 0.220615975 | axon guidance                                                                                       |
| miR-135b  | GO:0051899 | 0.220615975 | membrane depolarization                                                                             |
| miR-135b  | GO:0030182 | 0.220615975 | neuron differentiation                                                                              |
| miR-135b  | GO:0048812 | 0.220615975 | neuron projection morphogenesis                                                                     |
| miR-135b  | GO:0071363 | 0.220615975 | cellular response to growth factor stimulus                                                         |
| miR-135b  | GO:0031327 | 0.220615975 | negative regulation of cellular biosynthetic process                                                |
| miR-135b  | GO:0048666 | 0.237688267 | neuron development                                                                                  |
| miR-135b  | GO:0033268 | 0.237688267 | node of Ranvier                                                                                     |
| miR-135b  | GO:0045202 | 0.240472611 | synapse                                                                                             |
| miR-135b  | GO:2000113 | 0.240472611 | negative regulation of cellular macromolecule biosynthetic process                                  |
| miR-135b  | GO:0035556 | 0.248522008 | intracellular signal transduction                                                                   |
| miR-135b  | GO:0010646 | 0.248522008 | regulation of cell communication                                                                    |
| miR-135b  | GO:0000904 | 0.26182242  | cell morphogenesis involved in differentiation                                                      |
| miR-135b  | GO:0048666 | 0.237688267 | neuron development                                                                                  |

---
